# Supplementary material
Source: PubMed Central journal article supplement (PMC3059405)
Supplement: NIHMS273950-supplement-1_si_001.pdf [file NIHMS273950-supplement-1_si_001.pdf]

# **Supporting Information**

## **DFT Calculations for Intermediate and Active States of the Diron Center with Tryptophan or Tyrosine Radical in *Escherichia coli* Ribonucleotide Reductase**

**Wen-Ge Han and Louis Noodleman\***

**Department of Molecular Biology  
TPC15  
The Scripps Research Institute  
10550 North Torrey Pines Road  
La Jolla, California 92037**

\*To whom correspondence should be addressed.

E-mail: [lou@scripps.edu](mailto:lou@scripps.edu).

Fax: (858) 784-8896.

### Cartesian coordinates of the $S_{\text{total}} = 0$ state X(di- $\mu$ -oxo)-Trp48<sup>+</sup> geometry (Figure 1):

141 atoms:

|    |              |              |              |
|----|--------------|--------------|--------------|
| Fe | 0.030764635  | 0.320281930  | 0.533346092  |
| Fe | -1.072988189 | -0.030188518 | 3.073464665  |
| O  | 0.046248227  | -0.852022494 | 2.011233340  |
| O  | -1.401500059 | 0.968953766  | 1.664727974  |
| O  | -1.242491644 | -0.982742244 | -0.549052665 |
| H  | -2.044404712 | -1.145368089 | 0.020206435  |
| H  | -1.524017745 | -0.413940416 | -1.329378763 |
| C  | -0.897854991 | 2.916134101  | -2.930993998 |
| C  | -0.952935577 | 1.636775030  | -2.125548126 |
| O  | -1.624952879 | 0.656879595  | -2.545032703 |
| O  | -0.271010486 | 1.651789838  | -1.037792422 |
| C  | 3.458116793  | 3.486378292  | 1.385599742  |
| C  | 2.634459464  | 3.072502385  | 2.592692002  |
| C  | 1.550358198  | 2.020145222  | 2.377517113  |
| O  | 1.428048682  | 1.577950428  | 1.170365180  |
| O  | 0.863138396  | 1.669493340  | 3.357561939  |
| C  | 2.757917914  | 0.207420273  | -2.444835814 |
| C  | 2.637508727  | -0.921961778 | -1.482642299 |
| N  | 1.715779185  | -0.981793895 | -0.448849667 |
| C  | 3.374112185  | -2.085392661 | -1.477962514 |
| C  | 1.905201282  | -2.155493118 | 0.139795515  |
| N  | 2.892153208  | -2.846658380 | -0.446991215 |
| C  | 1.530075650  | 1.047222855  | -9.491492023 |
| C  | 0.661151165  | 0.512631172  | -8.390901538 |
| C  | 0.136491078  | -0.786905890 | -8.450336745 |
| C  | 0.348100061  | 1.283334091  | -7.268061682 |
| C  | -0.673868629 | -1.298609411 | -7.440905706 |
| C  | -0.463448412 | 0.789683768  | -6.250517440 |
| C  | -0.981500972 | -0.503828878 | -6.332488566 |
| O  | -1.788823642 | -1.032629656 | -5.361989091 |
| C  | -5.458225939 | 0.797769926  | 4.288344110  |
| C  | -4.221912404 | 1.507753075  | 3.746860445  |
| C  | -3.077829608 | 1.594064300  | 4.740273767  |
| O  | -3.254087262 | 2.138636961  | 5.846635547  |
| O  | -1.901693619 | 1.140864711  | 4.414314051  |
| C  | -2.990578646 | -4.543499471 | 2.566862768  |
| C  | -3.928148912 | -3.336685207 | 2.602917512  |
| C  | -3.219081094 | -2.065315346 | 2.147613117  |
| O  | -3.307412860 | -1.730003300 | 0.939251090  |
| O  | -2.574217724 | -1.448719854 | 3.064014724  |
| C  | -1.935735454 | -1.454214708 | 6.567854964  |
| C  | -0.586105238 | -1.610913305 | 5.961801023  |
| N  | -0.165192616 | -1.103053712 | 4.740031215  |
| C  | 0.467993930  | -2.291786384 | 6.522601186  |
| C  | 1.101107458  | -1.476297738 | 4.593605210  |
| N  | 1.513662824  | -2.187743974 | 5.647221933  |
| C  | 8.572612619  | -8.883235907 | -1.721426365 |
| C  | 7.322169473  | -8.072753497 | -1.720470962 |
| C  | 6.572242552  | -7.721965286 | -0.588054723 |
| C  | 6.647082664  | -7.455119016 | -2.826333731 |
| N  | 5.524861202  | -6.946166755 | -0.928714230 |
| C  | 5.531661615  | -6.751599024 | -2.297048328 |
| C  | 6.866480428  | -7.428004050 | -4.215816042 |
| C  | 4.656965549  | -6.025059898 | -3.095512534 |
| C  | 5.991004070  | -6.703968298 | -5.023574054 |
| C  | 4.905124596  | -6.009643581 | -4.472905384 |

|   |              |              |               |
|---|--------------|--------------|---------------|
| C | 2.025510410  | -5.216139447 | 2.492585468   |
| C | 3.309710487  | -5.850902792 | 1.952091196   |
| O | 4.011737382  | -6.557983403 | 2.726769981   |
| O | 3.612124595  | -5.587513169 | 0.736370659   |
| C | 6.422052196  | -3.705534397 | 6.868388024   |
| C | 5.233627970  | -4.112498355 | 6.036539584   |
| O | 4.093271184  | -3.657361529 | 6.256675335   |
| N | 5.475697030  | -5.026739798 | 5.086740001   |
| C | 3.985396425  | 2.035773473  | 8.104447943   |
| C | 2.573459506  | 2.442064436  | 7.838368990   |
| C | 1.833488825  | 2.068166193  | 6.729112251   |
| C | 1.686919513  | 3.249574008  | 8.634068100   |
| N | 0.576142045  | 2.583148242  | 6.790711517   |
| C | 0.440692537  | 3.314849865  | 7.946973332   |
| C | 1.803117040  | 3.926736382  | 9.863825130   |
| C | -0.659578236 | 4.017605215  | 8.433539789   |
| C | 0.706073446  | 4.629571316  | 10.357540568  |
| C | -0.509434814 | 4.677282693  | 9.652542423   |
| O | -4.792767363 | 1.446040254  | 8.516113736   |
| H | -1.112266556 | 3.774601097  | -2.285499728  |
| H | 0.118917202  | 3.056128577  | -3.319231147  |
| H | -1.605987346 | 2.897178055  | -3.762395674  |
| H | 4.018729700  | 2.642618552  | 0.967452153   |
| H | 2.828697565  | 3.892837972  | 0.585861877   |
| H | 4.180754799  | 4.260682575  | 1.673576548   |
| H | 2.125349322  | 3.942838562  | 3.029882456   |
| H | 3.283130423  | 2.688590232  | 3.391971960   |
| H | 3.642897543  | 0.066759080  | -3.072993577  |
| H | 1.885500665  | 0.259547979  | -3.106919368  |
| H | 2.841712534  | 1.172029699  | -1.934304656  |
| H | 4.185406612  | -2.420657790 | -2.112082548  |
| H | 1.342958369  | -2.526082426 | 0.982451271   |
| H | 3.208459568  | -3.767717389 | -0.139632249  |
| H | 2.198000000  | 0.260000000  | -9.844000000  |
| H | 0.935562662  | 1.381525541  | -10.352961162 |
| H | 2.135301423  | 1.895626662  | -9.155904687  |
| H | 0.372223612  | -1.423718598 | -9.304422978  |
| H | 0.748098418  | 2.293859325  | -7.176003488  |
| H | -1.064333487 | -2.314004938 | -7.500317377  |
| H | -0.691287276 | 1.410691371  | -5.389846599  |
| H | -1.821696401 | -0.412414693 | -4.614786166  |
| H | -6.257914721 | 0.811688021  | 3.537553218   |
| H | -5.243581682 | -0.250304218 | 4.529788808   |
| H | -5.837526456 | 1.285002961  | 5.193278125   |
| H | -4.479835500 | 2.548827462  | 3.504916966   |
| H | -3.879842199 | 1.037857991  | 2.822507576   |
| H | -2.127108077 | -4.391348948 | 3.225561942   |
| H | -3.518346385 | -5.445912255 | 2.899851494   |
| H | -2.615141168 | -4.728107472 | 1.552050610   |
| H | -4.304807835 | -3.191939323 | 3.622286111   |
| H | -4.784535726 | -3.507513654 | 1.938977092   |
| H | -1.967087825 | -1.998032577 | 7.517191683   |
| H | -2.168267246 | -0.404427203 | 6.766939425   |
| H | -2.721128285 | -1.850416691 | 5.917787216   |
| H | 0.552689745  | -2.826958915 | 7.459894605   |
| H | 1.733885036  | -1.242017262 | 3.752178979   |
| H | 2.431622740  | -2.606623663 | 5.758288380   |
| H | 9.468000000  | -8.258000000 | -1.545000000  |
| H | 8.552444053  | -9.636276723 | -0.925344564  |

|   |              |              |              |
|---|--------------|--------------|--------------|
| H | 8.718542166  | -9.396857011 | -2.677389236 |
| H | 6.740609061  | -7.993457075 | 0.448738739  |
| H | 4.854744475  | -6.522055669 | -0.261532623 |
| H | 7.703213960  | -7.964355490 | -4.661705162 |
| H | 3.803653878  | -5.495412572 | -2.674587206 |
| H | 6.150888704  | -6.678658697 | -6.100469160 |
| H | 4.235659370  | -5.450854177 | -5.125096644 |
| H | 1.606000000  | -5.719000000 | 3.376000000  |
| H | 2.259654720  | -4.186653325 | 2.790243762  |
| H | 1.260516928  | -5.164786120 | 1.711321463  |
| H | 6.513000000  | -4.433000000 | 7.686000000  |
| H | 7.356417235  | -3.716744617 | 6.297819825  |
| H | 6.253984226  | -2.713112458 | 7.292649185  |
| H | 6.412494029  | -5.364795189 | 4.927717850  |
| H | 4.739241393  | -5.395209108 | 4.496478783  |
| H | 4.382000000  | 1.434000000  | 7.275000000  |
| H | 4.642696438  | 2.904923606  | 8.240604523  |
| H | 4.065462093  | 1.436449310  | 9.022130647  |
| H | 2.137014794  | 1.462806674  | 5.885974613  |
| H | -0.151898929 | 2.414017043  | 6.111183674  |
| H | 2.735212485  | 3.904472428  | 10.428010790 |
| H | -1.598960025 | 4.051661806  | 7.884009445  |
| H | 0.789496725  | 5.153232921  | 11.309372208 |
| H | -1.351652519 | 5.234693804  | 10.061006864 |
| H | -4.333734275 | 1.652004473  | 7.684600371  |
| H | -5.677118071 | 1.813762891  | 8.369984751  |

### Cartesian coordinates of the $S_{\text{total}} = 0$ state X(di- $\mu$ -oxo)-Tyr122' geometry (Figure 4a):

141 atoms:

|    |           |           |           |
|----|-----------|-----------|-----------|
| Fe | 0.188658  | -0.006657 | 0.867403  |
| Fe | -1.030475 | -0.235103 | 3.292877  |
| O  | 0.204803  | -1.111261 | 2.363614  |
| O  | -1.346431 | 0.668944  | 1.846036  |
| O  | -1.052086 | -1.263715 | -0.262968 |
| H  | -1.856709 | -1.532802 | 0.319978  |
| H  | -1.423377 | -0.808347 | -1.033615 |
| C  | -1.529641 | 3.015957  | -2.959588 |
| C  | -1.135444 | 1.832854  | -2.131388 |
| O  | -1.340752 | 0.608012  | -2.652483 |
| O  | -0.610911 | 1.914819  | -1.031332 |
| C  | 3.329839  | 3.480128  | 1.569230  |
| C  | 2.543168  | 3.008787  | 2.779493  |
| C  | 1.531625  | 1.885789  | 2.577330  |
| O  | 1.400568  | 1.457131  | 1.358815  |
| O  | 0.905869  | 1.464063  | 3.566224  |
| C  | 2.947506  | 0.711866  | -1.928890 |
| C  | 2.827619  | -0.612824 | -1.259858 |
| N  | 1.821550  | -0.948323 | -0.364485 |
| C  | 3.628590  | -1.716787 | -1.444456 |
| C  | 2.026136  | -2.219937 | -0.039669 |
| N  | 3.099418  | -2.713759 | -0.666720 |
| C  | 1.338522  | 0.943006  | -9.888474 |
| C  | 0.411352  | 0.707707  | -8.745623 |
| C  | -0.104440 | -0.591848 | -8.488226 |

|   |           |           |           |
|---|-----------|-----------|-----------|
| C | 0.013677  | 1.769617  | -7.895761 |
| C | -0.951462 | -0.830247 | -7.436435 |
| C | -0.830584 | 1.558410  | -6.835157 |
| C | -1.345193 | 0.237654  | -6.538577 |
| O | -2.095399 | 0.022449  | -5.539407 |
| C | -5.470320 | 1.296397  | 4.085792  |
| C | -4.064738 | 1.600855  | 3.582957  |
| C | -3.008141 | 1.661299  | 4.672125  |
| O | -3.198184 | 2.350987  | 5.694628  |
| O | -1.887983 | 1.021170  | 4.523539  |
| C | -3.494172 | -4.785531 | 2.632739  |
| C | -4.113465 | -3.395014 | 2.764986  |
| C | -3.165397 | -2.300849 | 2.287674  |
| O | -3.030632 | -2.154337 | 1.039914  |
| O | -2.587743 | -1.632561 | 3.203390  |
| C | -2.298173 | -1.366295 | 6.677645  |
| C | -0.910202 | -1.667067 | 6.235727  |
| N | -0.329849 | -1.259267 | 5.041951  |
| C | 0.025609  | -2.390367 | 6.933580  |
| C | 0.911784  | -1.729489 | 5.042335  |
| N | 1.159244  | -2.410495 | 6.165459  |
| C | 8.596490  | -8.926255 | -1.483322 |
| C | 7.311405  | -8.168391 | -1.598612 |
| C | 6.465588  | -7.831526 | -0.563441 |
| C | 6.719114  | -7.601009 | -2.780038 |
| N | 5.395923  | -7.105285 | -1.019990 |
| C | 5.521004  | -6.940559 | -2.373629 |
| C | 7.071939  | -7.578183 | -4.144415 |
| C | 4.687220  | -6.281484 | -3.284567 |
| C | 6.244974  | -6.921919 | -5.048943 |
| C | 5.062319  | -6.282077 | -4.623173 |
| C | 1.919359  | -5.255534 | 2.431224  |
| C | 3.211451  | -5.839145 | 1.852498  |
| O | 4.010958  | -6.424724 | 2.638687  |
| O | 3.411777  | -5.661446 | 0.604662  |
| C | 6.106437  | -3.671200 | 7.007154  |
| C | 4.925389  | -4.247554 | 6.263231  |
| O | 3.751146  | -4.063669 | 6.641774  |
| N | 5.225933  | -4.992854 | 5.189316  |
| C | 4.075564  | 2.133639  | 8.062380  |
| C | 2.648176  | 2.546527  | 7.885194  |
| C | 1.793916  | 2.106424  | 6.900877  |
| C | 1.880503  | 3.469406  | 8.681085  |
| N | 0.561338  | 2.693848  | 7.031662  |
| C | 0.575829  | 3.537284  | 8.111087  |
| C | 2.152368  | 4.247829  | 9.823208  |
| C | -0.434595 | 4.348855  | 8.636399  |
| C | 1.148933  | 5.051143  | 10.351267 |
| C | -0.130843 | 5.103448  | 9.763555  |
| O | -4.615805 | 1.477379  | 8.366307  |
| H | -1.683593 | 3.877956  | -2.307383 |
| H | -0.702053 | 3.249553  | -3.642271 |
| H | -2.426261 | 2.824776  | -3.555260 |
| H | 3.943506  | 2.677090  | 1.146123  |
| H | 2.671801  | 3.849728  | 0.774795  |
| H | 4.002464  | 4.297948  | 1.857416  |
| H | 1.979547  | 3.842054  | 3.221925  |
| H | 3.221341  | 2.667952  | 3.573217  |
| H | 3.896695  | 0.772996  | -2.468921 |

|   |           |           |            |
|---|-----------|-----------|------------|
| H | 2.140971  | 0.863116  | -2.656381  |
| H | 2.900814  | 1.534421  | -1.210882  |
| H | 4.506446  | -1.871181 | -2.059141  |
| H | 1.417192  | -2.803222 | 0.633794   |
| H | 3.450137  | -3.655596 | -0.522185  |
| H | 2.198001  | 0.260000  | -9.843999  |
| H | 0.833208  | 0.730453  | -10.842409 |
| H | 1.706600  | 1.972306  | -9.912767  |
| H | 0.186317  | -1.414860 | -9.142221  |
| H | 0.392241  | 2.772826  | -8.092419  |
| H | -1.339605 | -1.828907 | -7.239756  |
| H | -1.136929 | 2.382534  | -6.195005  |
| H | -1.750179 | 0.660038  | -3.536570  |
| H | -6.178779 | 1.312457  | 3.248349   |
| H | -5.522252 | 0.301251  | 4.545660   |
| H | -5.805223 | 2.030518  | 4.826381   |
| H | -4.054139 | 2.593168  | 3.107579   |
| H | -3.766357 | 0.884154  | 2.816693   |
| H | -2.576410 | -4.871485 | 3.228497   |
| H | -4.197464 | -5.548850 | 2.988266   |
| H | -3.244710 | -5.013627 | 1.589549   |
| H | -4.384885 | -3.201664 | 3.808329   |
| H | -5.026131 | -3.338813 | 2.157373   |
| H | -2.501782 | -1.889402 | 7.616648   |
| H | -2.436505 | -0.294083 | 6.841988   |
| H | -3.036097 | -1.683578 | 5.936204   |
| H | -0.026858 | -2.884817 | 7.895080   |
| H | 1.633524  | -1.595173 | 4.251165   |
| H | 2.026985  | -2.889988 | 6.380611   |
| H | 9.468001  | -8.258000 | -1.544999  |
| H | 8.658059  | -9.451702 | -0.524182  |
| H | 8.705537  | -9.672157 | -2.280649  |
| H | 6.549998  | -8.063889 | 0.493326   |
| H | 4.690559  | -6.667063 | -0.415228  |
| H | 7.980973  | -8.068827 | -4.493575  |
| H | 3.770737  | -5.789940 | -2.958341  |
| H | 6.512416  | -6.901073 | -6.105330  |
| H | 4.431841  | -5.777105 | -5.354173  |
| H | 1.606001  | -5.719000 | 3.376000   |
| H | 2.092689  | -4.192532 | 2.638496   |
| H | 1.102516  | -5.315818 | 1.704296   |
| H | 6.513001  | -4.433000 | 7.685999   |
| H | 6.911600  | -3.372994 | 6.326937   |
| H | 5.782820  | -2.813161 | 7.600786   |
| H | 6.184741  | -5.109545 | 4.898329   |
| H | 4.510522  | -5.420936 | 4.612574   |
| H | 4.382000  | 1.434001  | 7.274999   |
| H | 4.756756  | 2.994489  | 8.026861   |
| H | 4.241374  | 1.640017  | 9.029777   |
| H | 1.972945  | 1.416064  | 6.086809   |
| H | -0.227370 | 2.516167  | 6.425168   |
| H | 3.135935  | 4.220987  | 10.293449  |
| H | -1.423293 | 4.386964  | 8.178152   |
| H | 1.352626  | 5.652833  | 11.236725  |
| H | -0.897222 | 5.744328  | 10.198313  |
| H | -4.182404 | 1.751597  | 7.540459   |
| H | -5.165759 | 2.242914  | 8.583976   |

### Cartesian coordinates of the active state model A(O<sub>br</sub>,H<sub>2</sub>O<sub>2</sub>) (Figure 6a):

142 atoms:

|    |              |              |              |
|----|--------------|--------------|--------------|
| Fe | 0.247053299  | 0.168364897  | 0.305994504  |
| Fe | -1.060089279 | 0.112684048  | 3.172481749  |
| O  | -0.085060715 | -0.671289371 | 1.841911670  |
| O  | -2.006434851 | 1.248857094  | 1.439184896  |
| O  | -1.166589999 | -1.192256905 | -0.721112304 |
| H  | -1.886869135 | -1.392446101 | -0.056414020 |
| H  | -1.627043606 | -0.719706548 | -1.429298981 |
| C  | -0.684789897 | 3.433479789  | -2.424162584 |
| C  | -0.836815200 | 2.616272894  | -1.167624561 |
| O  | -1.486563367 | 3.100039597  | -0.199365580 |
| O  | -0.313722297 | 1.447839092  | -1.181856239 |
| C  | 3.435398329  | 3.417625523  | 1.598171672  |
| C  | 2.506766443  | 2.944171564  | 2.703333291  |
| C  | 1.391452155  | 1.997788977  | 2.289676836  |
| O  | 1.436067855  | 1.567667496  | 1.085246949  |
| O  | 0.517641596  | 1.710223560  | 3.153510370  |
| C  | 2.829723895  | 0.292559252  | -2.406633657 |
| C  | 2.736189794  | -0.896241613 | -1.518608754 |
| N  | 1.818672269  | -1.018262646 | -0.485891323 |
| C  | 3.492094483  | -2.044290462 | -1.549162007 |
| C  | 2.029336384  | -2.206182416 | 0.074109342  |
| N  | 3.025180521  | -2.847508083 | -0.541564142 |
| C  | 1.510350574  | 1.027722524  | -9.479282865 |
| C  | 0.646923425  | 0.484716330  | -8.394739836 |
| C  | 0.151115817  | -0.843715281 | -8.471803972 |
| C  | 0.290096883  | 1.277726882  | -7.276060631 |
| C  | -0.665635334 | -1.359165025 | -7.498182536 |
| C  | -0.530957374 | 0.789461134  | -6.291013470 |
| C  | -1.063730047 | -0.556687826 | -6.357736165 |
| O  | -1.841691658 | -1.004128680 | -5.466539600 |
| C  | -5.601164500 | 0.880326953  | 4.526300948  |
| C  | -4.364270692 | 1.528173811  | 3.921229380  |
| C  | -3.184267366 | 1.694959355  | 4.870195171  |
| O  | -3.355407738 | 2.228279451  | 5.986170531  |
| O  | -2.009679874 | 1.328254439  | 4.466866599  |
| C  | -2.924777875 | -4.509208821 | 2.615287582  |
| C  | -3.807002382 | -3.263480198 | 2.706233615  |
| C  | -3.108753261 | -2.012529251 | 2.187938484  |
| O  | -3.132712732 | -1.775095297 | 0.951283747  |
| O  | -2.555369624 | -1.273954777 | 3.072801712  |
| C  | -1.939659044 | -1.370969360 | 6.595193132  |
| C  | -0.586145946 | -1.570085271 | 6.009292087  |
| N  | -0.129094004 | -1.031791484 | 4.812747611  |
| C  | 0.425660098  | -2.323409528 | 6.551553136  |
| C  | 1.117009119  | -1.466220180 | 4.659342695  |
| N  | 1.484051191  | -2.239818499 | 5.687619812  |
| C  | 8.606709063  | -8.916213116 | -1.732811072 |
| C  | 7.317540077  | -8.153528904 | -1.722083214 |
| C  | 6.564396472  | -7.846706889 | -0.608030417 |
| C  | 6.637495397  | -7.535177296 | -2.828581241 |
| N  | 5.475276647  | -7.088320690 | -0.946512740 |
| C  | 5.489820473  | -6.872921864 | -2.297381518 |
| C  | 6.864667678  | -7.469358524 | -4.218365217 |
| C  | 4.591627030  | -6.164915016 | -3.104861955 |
| C  | 5.972321174  | -6.767429534 | -5.020221031 |

|   |              |              |               |
|---|--------------|--------------|---------------|
| C | 4.846670788  | -6.120475236 | -4.469827147  |
| C | 2.025512802  | -5.236495077 | 2.485549835   |
| C | 3.295626850  | -5.904188413 | 1.953146605   |
| O | 3.991447913  | -6.599513221 | 2.746426602   |
| O | 3.587887691  | -5.676598974 | 0.731326080   |
| C | 6.376850454  | -3.698792955 | 6.882097056   |
| C | 5.183232856  | -4.126792492 | 6.067549199   |
| O | 4.036649991  | -3.699398807 | 6.310731418   |
| N | 5.429833209  | -5.022526508 | 5.101761668   |
| C | 4.011519643  | 2.037233173  | 8.113679293   |
| C | 2.594087304  | 2.451476491  | 7.874116899   |
| C | 1.829872883  | 2.088508570  | 6.789515949   |
| C | 1.738481258  | 3.271025903  | 8.693651836   |
| N | 0.572692136  | 2.627397540  | 6.877239567   |
| C | 0.477448676  | 3.353502504  | 8.033753058   |
| C | 1.892004784  | 3.940694355  | 9.924513872   |
| C | -0.603253777 | 4.070790219  | 8.555511874   |
| C | 0.817883127  | 4.652194905  | 10.447837236  |
| C | -0.416473594 | 4.718229574  | 9.770370991   |
| O | -4.592418259 | 1.391567955  | 8.625760930   |
| H | -0.872457291 | 4.491353546  | -2.224770450  |
| H | 0.307214293  | 3.292963227  | -2.863640415  |
| H | -1.427395641 | 3.080782108  | -3.151350245  |
| H | 3.989677799  | 2.585644078  | 1.149938969   |
| H | 2.883210318  | 3.918282579  | 0.794591428   |
| H | 4.164215108  | 4.130228526  | 2.003267238   |
| H | 2.028746685  | 3.792175293  | 3.210645137   |
| H | 3.075501939  | 2.421619007  | 3.485712956   |
| H | 3.666871866  | 0.174181989  | -3.099884803  |
| H | 1.913329048  | 0.424803697  | -2.992751393  |
| H | 2.984749274  | 1.211394312  | -1.830318549  |
| H | 4.311505407  | -2.343591215 | -2.190371966  |
| H | 1.472249929  | -2.612528574 | 0.903659640   |
| H | 3.356802144  | -3.770553507 | -0.267504640  |
| H | 2.198000000  | 0.260000000  | -9.843999000  |
| H | 0.891616603  | 1.329429920  | -10.338982307 |
| H | 2.078764330  | 1.904699460  | -9.156885189  |
| H | 0.431572894  | -1.461383564 | -9.325854758  |
| H | 0.681795245  | 2.292635253  | -7.203259861  |
| H | -1.043711277 | -2.378795970 | -7.559623656  |
| H | -0.806172389 | 1.399269500  | -5.432464758  |
| H | -1.791456678 | 2.024338177  | 0.795612103   |
| H | -6.402591014 | 0.840705796  | 3.777291692   |
| H | -5.395101448 | -0.149453505 | 4.844692403   |
| H | -5.975557020 | 1.437452894  | 5.391459494   |
| H | -4.611995580 | 2.545183536  | 3.581253339   |
| H | -4.045616487 | 0.973936320  | 3.039798822   |
| H | -2.016892787 | -4.403774740 | 3.222035170   |
| H | -3.475619424 | -5.384170317 | 2.982734738   |
| H | -2.622464445 | -4.713727931 | 1.580721291   |
| H | -4.107768818 | -3.099177375 | 3.746845914   |
| H | -4.713429339 | -3.414441591 | 2.106665416   |
| H | -2.014237280 | -1.931227846 | 7.532328564   |
| H | -2.137560807 | -0.316377679 | 6.808015535   |
| H | -2.726363096 | -1.724468578 | 5.922074182   |
| H | 0.474679571  | -2.901200210 | 7.466100233   |
| H | 1.769255516  | -1.238809466 | 3.829071331   |
| H | 2.381590078  | -2.703756570 | 5.797933816   |
| H | 9.467999000  | -8.258002000 | -1.545000000  |



|   |              |              |              |
|---|--------------|--------------|--------------|
| H | 8.618568649  | -9.686663621 | -0.953296406 |
| H | 8.777168955  | -9.413534700 | -2.693989675 |
| H | 6.732395594  | -8.116826918 | 0.429651903  |
| H | 4.8144440039 | -6.669924526 | -0.277264666 |
| H | 7.726899899  | -7.962230990 | -4.667804114 |
| H | 3.714902492  | -5.675793614 | -2.681229124 |
| H | 6.141213220  | -6.715927598 | -6.095629857 |
| H | 4.162868379  | -5.579201099 | -5.123026571 |
| H | 1.606001000  | -5.719000000 | 3.376000000  |
| H | 2.282348118  | -4.208611812 | 2.769857943  |
| H | 1.257909082  | -5.183137073 | 1.707305545  |
| H | 6.513002000  | -4.433000000 | 7.686000000  |
| H | 7.297198004  | -3.670942971 | 6.289718819  |
| H | 6.188220505  | -2.719144222 | 7.326810872  |
| H | 6.370193042  | -5.342755690 | 4.927593105  |
| H | 4.690884738  | -5.409079027 | 4.525851209  |
| H | 4.382000000  | 1.434001000  | 7.275000000  |
| H | 4.679354763  | 2.901563325  | 8.227081655  |
| H | 4.111716567  | 1.438176637  | 9.029279867  |
| H | 2.098945456  | 1.471531281  | 5.942270486  |
| H | -0.179740600 | 2.456054316  | 6.225385451  |
| H | 2.836208578  | 3.899385045  | 10.467917182 |
| H | -1.555346822 | 4.116358498  | 8.028580431  |
| H | 0.926756213  | 5.166144695  | 11.402497247 |
| H | -1.241809478 | 5.280393394  | 10.206272893 |
| H | -4.223727542 | 1.652375919  | 7.763709182  |
| H | -5.455669391 | 1.828571278  | 8.632725967  |
| H | -2.648478011 | 0.683042034  | 0.988790799  |

### Cartesian coordinates of the active state model A(O<sub>br</sub>,H<sub>2</sub>O<sub>tl</sub>) (Figure 6b):

142 atoms:

|    |              |              |              |
|----|--------------|--------------|--------------|
| Fe | 0.178184598  | 0.199571674  | 0.295002609  |
| Fe | -0.930788825 | 0.021271589  | 3.217960682  |
| O  | -0.030280715 | -0.719027907 | 1.822993809  |
| O  | -1.788640247 | 1.253613664  | 1.211835762  |
| O  | -1.255623564 | -1.116801377 | -0.722552153 |
| H  | -1.953133298 | -1.360622173 | -0.041049763 |
| H  | -1.735981384 | -0.615936754 | -1.396566632 |
| C  | -0.608380541 | 3.424702186  | -2.618582482 |
| C  | -0.790326823 | 2.628282043  | -1.350034163 |
| O  | -1.498830187 | 3.133834857  | -0.429002217 |
| O  | -0.245521412 | 1.474852422  | -1.305446912 |
| C  | 3.397940141  | 3.390354390  | 1.639513275  |
| C  | 2.477844395  | 2.907285901  | 2.746456614  |
| C  | 1.347610940  | 1.978622497  | 2.336380267  |
| O  | 1.267898317  | 1.678821176  | 1.100018901  |
| O  | 0.562263166  | 1.589409564  | 3.249229730  |
| C  | 2.827596442  | 0.368035708  | -2.443383751 |
| C  | 2.730697355  | -0.816062121 | -1.548950171 |
| N  | 1.803939505  | -0.949012117 | -0.523690800 |
| C  | 3.508117847  | -1.949952608 | -1.568424271 |
| C  | 2.032260100  | -2.132319529 | 0.040171514  |
| N  | 3.047064665  | -2.757826398 | -0.561933954 |
| C  | 1.484927246  | 1.013721226  | -9.495299344 |
| C  | 0.629680777  | 0.469622561  | -8.404062476 |

|   |              |              |              |
|---|--------------|--------------|--------------|
| C | 0.129590280  | -0.857674358 | -8.477463699 |
| C | 0.275547273  | 1.265217642  | -7.286051381 |
| C | -0.695444780 | -1.365013053 | -7.506394160 |
| C | -0.552333510 | 0.785007098  | -6.303320831 |
| C | -1.099330981 | -0.555183137 | -6.372606665 |
| O | -1.898828116 | -0.989301483 | -5.494285504 |
| C | -5.571693278 | 0.932948156  | 4.462549884  |
| C | -4.326005897 | 1.556360734  | 3.849245466  |
| C | -3.136425160 | 1.675745056  | 4.793508695  |
| O | -3.286579027 | 2.177118126  | 5.926609587  |
| O | -1.973282751 | 1.306833101  | 4.363032855  |
| C | -2.898157512 | -4.522189443 | 2.645061144  |
| C | -3.755652773 | -3.264188357 | 2.784298052  |
| C | -3.069409721 | -2.031475932 | 2.211609791  |
| O | -3.107462617 | -1.855847733 | 0.965996711  |
| O | -2.516393474 | -1.247492156 | 3.057873455  |
| C | -1.911730319 | -1.386510319 | 6.595467734  |
| C | -0.555022648 | -1.620205915 | 6.031942701  |
| N | -0.069903201 | -1.098325848 | 4.839382513  |
| C | 0.441028878  | -2.377620214 | 6.595948983  |
| C | 1.177659767  | -1.540594608 | 4.711986694  |
| N | 1.515994597  | -2.308826348 | 5.751463584  |
| C | 8.603852890  | -8.918947225 | -1.719933039 |
| C | 7.310957953  | -8.161628563 | -1.700238749 |
| C | 6.556886607  | -7.868024676 | -0.582742490 |
| C | 6.625195679  | -7.539521845 | -2.801653564 |
| N | 5.459739669  | -7.117568241 | -0.915353805 |
| C | 5.474058533  | -6.889009121 | -2.264018288 |
| C | 6.849817895  | -7.463406174 | -4.191478154 |
| C | 4.569958877  | -6.181598958 | -3.065281854 |
| C | 5.952469945  | -6.760630930 | -4.986832521 |
| C | 4.823217622  | -6.125576720 | -4.430274048 |
| C | 2.021212175  | -5.228687518 | 2.486946469  |
| C | 3.306954025  | -5.874649565 | 1.964900315  |
| O | 3.996312697  | -6.575777630 | 2.760204071  |
| O | 3.616086388  | -5.626222204 | 0.752157621  |
| C | 6.339037533  | -3.687702490 | 6.902109615  |
| C | 5.140650229  | -4.147730527 | 6.115955750  |
| O | 3.983451594  | -3.802656986 | 6.430413568  |
| N | 5.395044830  | -4.980299417 | 5.098655607  |
| C | 4.013279593  | 2.048196221  | 8.107066061  |
| C | 2.595062851  | 2.464890685  | 7.872979309  |
| C | 1.818071177  | 2.099597641  | 6.798481011  |
| C | 1.751545626  | 3.294655373  | 8.694737504  |
| N | 0.564373092  | 2.646979286  | 6.894510853  |
| C | 0.484205184  | 3.380239508  | 8.048190621  |
| C | 1.922093604  | 3.969602733  | 9.919611732  |
| C | -0.588062339 | 4.102201922  | 8.580687719  |
| C | 0.858298243  | 4.689464751  | 10.451943343 |
| C | -0.384441477 | 4.754899829  | 9.789973444  |
| O | -4.578786501 | 1.266118753  | 8.566928271  |
| H | -0.703921125 | 4.495513253  | -2.418422144 |
| H | 0.351446396  | 3.204118413  | -3.091853629 |
| H | -1.408796225 | 3.139861254  | -3.313735117 |
| H | 3.928615554  | 2.559311956  | 1.161816978  |
| H | 2.845156876  | 3.923982727  | 0.858413512  |
| H | 4.147278922  | 4.076279489  | 2.053285826  |
| H | 2.006625655  | 3.754476676  | 3.263490798  |
| H | 3.048413967  | 2.378309118  | 3.521921074  |

|   |              |              |               |
|---|--------------|--------------|---------------|
| H | 3.667096802  | 0.241893597  | -3.132774277  |
| H | 1.913734081  | 0.501081316  | -3.031543832  |
| H | 2.984018560  | 1.290105625  | -1.872791368  |
| H | 4.337279845  | -2.238430504 | -2.202326999  |
| H | 1.477664113  | -2.546070552 | 0.867698007   |
| H | 3.392508278  | -3.673829001 | -0.285000083  |
| H | 2.198000000  | 0.260000000  | -9.843999000  |
| H | 0.862549800  | 1.276169836  | -10.365126973 |
| H | 2.024315435  | 1.914224952  | -9.189081212  |
| H | 0.409110198  | -1.479734639 | -9.328667215  |
| H | 0.668481862  | 2.279963915  | -7.216235588  |
| H | -1.079731170 | -2.382438772 | -7.566643738  |
| H | -0.831690158 | 1.400604025  | -5.450344884  |
| H | -1.713357228 | 2.076189635  | 0.591988248   |
| H | -6.383058053 | 0.910708291  | 3.723920713   |
| H | -5.383768716 | -0.100643013 | 4.779912445   |
| H | -5.923002250 | 1.497088591  | 5.332779884   |
| H | -4.551323737 | 2.584199785  | 3.526317115   |
| H | -4.026605081 | 1.005777290  | 2.956858222   |
| H | -1.954142586 | -4.426967180 | 3.196218771   |
| H | -3.436503326 | -5.389600828 | 3.046871129   |
| H | -2.660477286 | -4.731009665 | 1.594915729   |
| H | -3.993498496 | -3.088866753 | 3.838740072   |
| H | -4.697758422 | -3.403120328 | -2.238689641  |
| H | -2.017582518 | -1.948989391 | 7.528030700   |
| H | -2.080725543 | -0.327392133 | 6.811827329   |
| H | -2.697791085 | -1.711427119 | 5.907989159   |
| H | 0.469643091  | -2.947992726 | 7.515821036   |
| H | 1.846730265  | -1.318715637 | 3.893189247   |
| H | 2.408490091  | -2.779593984 | 5.883458672   |
| H | 9.467999000  | -8.258002000 | -1.545000000  |
| H | 8.626400759  | -9.685701138 | -0.936980534  |
| H | 8.766315288  | -9.421345382 | -2.680078747  |
| H | 6.726602414  | -8.147832768 | 0.452112092   |
| H | 4.812099961  | -6.683770061 | -0.243653753  |
| H | 7.713761812  | -7.948984422 | -4.645767542  |
| H | 3.689929231  | -5.702271368 | -2.637075006  |
| H | 6.119609483  | -6.700168763 | -6.062032705  |
| H | 4.134519701  | -5.584718628 | -5.078625554  |
| H | 1.606001000  | -5.719000000 | 3.376000000   |
| H | 2.254747443  | -4.194178622 | 2.767265272   |
| H | 1.258541877  | -5.191711862 | 1.702610827   |
| H | 6.513002000  | -4.433000000 | 7.686000000   |
| H | 7.245363698  | -3.620811128 | 6.292593986   |
| H | 6.128529169  | -2.725942097 | 7.374781094   |
| H | 6.342065902  | -5.256863060 | 4.889121080   |
| H | 4.654647887  | -5.402084107 | 4.549715991   |
| H | 4.382000000  | 1.434001000  | 7.275000000   |
| H | 4.683269455  | 2.912588593  | 8.206965196   |
| H | 4.117763296  | 1.459515037  | 9.028816048   |
| H | 2.074474402  | 1.475198966  | 5.953135468   |
| H | -0.193073258 | 2.482346494  | 6.246604677   |
| H | 2.873136156  | 3.928500375  | 10.450880883  |
| H | -1.547610286 | 4.146639241  | 8.067262989   |
| H | 0.981693241  | 5.209399886  | 11.401283513  |
| H | -1.203196207 | 5.320436359  | 10.233758744  |
| H | -4.193751554 | 1.549287173  | 7.720253976   |
| H | -5.348527618 | 1.844700310  | 8.655833842   |
| H | -2.565409534 | 0.774453434  | 0.893663993   |

### Cartesian coordinates of the active state model A(O<sub>br</sub>,OH<sup>-</sup><sub>br</sub>)-Asp84H (Figure 6d):

142 atoms:

|    |              |              |              |
|----|--------------|--------------|--------------|
| Fe | 0.233433178  | 0.038297677  | 0.774703049  |
| Fe | -1.070126075 | -0.158313306 | 3.335950243  |
| O  | 0.125015152  | -1.008498290 | 2.211505476  |
| O  | -1.495271867 | 0.898624196  | 1.558928038  |
| O  | -1.048054956 | -1.148790245 | -0.441924377 |
| H  | -1.794180859 | -1.452614780 | 0.173704676  |
| H  | -1.476650167 | -0.633734197 | -1.140043362 |
| C  | -1.560016147 | 3.196718273  | -3.108404418 |
| C  | -1.027854866 | 2.067821920  | -2.280556645 |
| O  | -1.235841175 | 0.814924733  | -2.734998986 |
| O  | -0.399705069 | 2.209730459  | -1.244133139 |
| C  | 3.302270519  | 3.505425976  | 1.768677853  |
| C  | 2.454115325  | 2.988805061  | 2.917792757  |
| C  | 1.426773619  | 1.912232216  | 2.595906659  |
| O  | 1.340164995  | 1.568218803  | 1.353467235  |
| O  | 0.734694208  | 1.452700959  | 3.530630539  |
| C  | 3.062760374  | 0.720464756  | -1.869199111 |
| C  | 2.916824496  | -0.601702454 | -1.201519408 |
| N  | 1.896277404  | -0.919186023 | -0.315748764 |
| C  | 3.710336558  | -1.714368965 | -1.360476327 |
| C  | 2.086919658  | -2.189115254 | 0.029657566  |
| N  | 3.162069479  | -2.697804886 | -0.578969125 |
| C  | 1.269622703  | 0.835761637  | -9.969905175 |
| C  | 0.357559762  | 0.630502968  | -8.807963839 |
| C  | -0.115278941 | -0.667747776 | -8.478920497 |
| C  | -0.060393756 | 1.719611269  | -8.005437133 |
| C  | -0.943697076 | -0.878222289 | -7.405463970 |
| C  | -0.887818568 | 1.536775031  | -6.924542198 |
| C  | -1.362379519 | 0.220062386  | -6.558504346 |
| O  | -2.104705859 | 0.035796873  | -5.545503379 |
| C  | -5.637037401 | 1.489153981  | 4.335477905  |
| C  | -4.226566391 | 1.656821675  | 3.793640031  |
| C  | -3.114933386 | 1.724657878  | 4.834303612  |
| O  | -3.297312582 | 2.314911612  | 5.922282639  |
| O  | -1.972826584 | 1.212444400  | 4.518433809  |
| C  | -3.550749069 | -4.719105789 | 2.572691825  |
| C  | -4.090315399 | -3.300413776 | 2.744062711  |
| C  | -3.115683726 | -2.236851346 | 2.253315167  |
| O  | -2.926932642 | -2.148948902 | 1.012995579  |
| O  | -2.580404698 | -1.505923575 | 3.156850354  |
| C  | -2.272962632 | -1.355923608 | 6.793199592  |
| C  | -0.904081916 | -1.699763053 | 6.321713702  |
| N  | -0.326255201 | -1.247065098 | 5.144162689  |
| C  | 0.003597848  | -2.504377880 | 6.967081415  |
| C  | 0.889834659  | -1.776596823 | 5.099480034  |
| N  | 1.124231564  | -2.534706578 | 6.179567535  |
| C  | 8.605420357  | -8.928850091 | -1.417773999 |
| C  | 7.316039193  | -8.183542141 | -1.552041694 |
| C  | 6.473184970  | -7.811961778 | -0.524647742 |
| C  | 6.722213129  | -7.651128632 | -2.748497133 |
| N  | 5.407707691  | -7.095249772 | -0.999868947 |
| C  | 5.528772562  | -6.972646953 | -2.359247210 |
| C  | 7.072273819  | -7.672450120 | -4.113012294 |
| C  | 4.697774385  | -6.334876163 | -3.286625676 |
| C  | 6.246483447  | -7.038977682 | -5.034687321 |

|   |              |              |               |
|---|--------------|--------------|---------------|
| C | 5.070348374  | -6.378749405 | -4.625992084  |
| C | 1.937814184  | -5.247827596 | 2.442411932   |
| C | 3.229376537  | -5.840897322 | 1.873493167   |
| O | 4.023453110  | -6.426518262 | 2.664031638   |
| O | 3.431614766  | -5.671251342 | 0.624447997   |
| C | 5.948244078  | -3.663586810 | 7.140278004   |
| C | 4.842701915  | -4.312679500 | 6.340633551   |
| O | 3.657106569  | -4.324690313 | 6.732879051   |
| N | 5.219953471  | -4.888348371 | 5.189673361   |
| C | 4.103113530  | 2.164733950  | 8.043789597   |
| C | 2.667934929  | 2.564895702  | 7.908030684   |
| C | 1.777384897  | 2.089463539  | 6.973606713   |
| C | 1.928813776  | 3.513385080  | 8.701004420   |
| N | 0.549081736  | 2.678855629  | 7.129638750   |
| C | 0.603420550  | 3.560134164  | 8.177291361   |
| C | 2.243757082  | 4.335270146  | 9.801037865   |
| C | -0.387807060 | 4.390861972  | 8.709378787   |
| C | 1.259760530  | 5.159937226  | 10.334474321  |
| C | -0.042072095 | 5.189706453  | 9.793277884   |
| O | -4.792373211 | 1.272520968  | 8.410549461   |
| H | -1.710439940 | 4.070498577  | -2.471508438  |
| H | -0.808130308 | 3.451206314  | -3.866307482  |
| H | -2.491705616 | 2.933959675  | -3.618200440  |
| H | 3.916143409  | 2.711471363  | 1.329160840   |
| H | 2.685598695  | 3.929051309  | 0.968006340   |
| H | 3.978099206  | 4.292386692  | 2.126335315   |
| H | 1.894554611  | 3.810618297  | 3.385670390   |
| H | 3.088743749  | 2.582586919  | 3.716527627   |
| H | 4.012228802  | 0.761722826  | -2.410768778  |
| H | 2.256608296  | 0.892712361  | -2.592012140  |
| H | 3.037445255  | 1.541714477  | -1.147849367  |
| H | 4.599784053  | -1.880532825 | -1.954690855  |
| H | 1.465844944  | -2.753309240 | 0.707686145   |
| H | 3.500254405  | -3.642705559 | -0.422812824  |
| H | 2.198000000  | 0.259999000  | -9.844000000  |
| H | 0.808070766  | 0.465074401  | -10.895867644 |
| H | 1.531762637  | 1.888553323  | -10.103768952 |
| H | 0.192437886  | -1.513505447 | -9.095080916  |
| H | 0.289666752  | 2.722237585  | -8.251973883  |
| H | -1.299726704 | -1.876746531 | -7.155402239  |
| H | -1.207750322 | 2.383077549  | -6.320571154  |
| H | -1.716430916 | 0.818667299  | -3.584087414  |
| H | -6.360823946 | 1.504689484  | 3.510759244   |
| H | -5.751199558 | 0.531058276  | 4.858601404   |
| H | -5.902578311 | 2.289412364  | 5.034126710   |
| H | -4.156054189 | 2.603319917  | 3.234335165   |
| H | -3.990062106 | 0.865758105  | 3.077692010   |
| H | -2.631311331 | -4.870651902 | 3.152633542   |
| H | -4.291269957 | -5.449942371 | 2.920951309   |
| H | -3.329552183 | -4.938056091 | 1.521320531   |
| H | -4.333691888 | -3.109589177 | 3.794554205   |
| H | -5.013072071 | -3.190134740 | 2.157717924   |
| H | -2.481993422 | -1.882192016 | 7.729579761   |
| H | -2.372087402 | -0.281432576 | 6.971644219   |
| H | -3.036369779 | -1.638813827 | 6.061973747   |
| H | -0.055422790 | -3.046050801 | 7.902765021   |
| H | 1.608388062  | -1.634186912 | 4.305514331   |
| H | 1.973490812  | -3.057652451 | 6.367042941   |
| H | 9.468001000  | -8.258000000 | -1.544997000  |

|   |              |              |              |
|---|--------------|--------------|--------------|
| H | 8.693413400  | -9.390246957 | -0.428208407 |
| H | 8.702289927  | -9.722889064 | -2.168940339 |
| H | 6.561006371  | -8.010575598 | 0.538655283  |
| H | 4.698738025  | -6.648396644 | -0.403289738 |
| H | 7.976937054  | -8.179866714 | -4.449402396 |
| H | 3.785886158  | -5.826246805 | -2.973659852 |
| H | 6.510716169  | -7.053360340 | -6.091882504 |
| H | 4.441927823  | -5.891564372 | -5.370703616 |
| H | 1.606001000  | -5.719000000 | 3.376000000  |
| H | 2.122104112  | -4.190189118 | 2.667239501  |
| H | 1.130230394  | -5.288547852 | 1.704145915  |
| H | 6.513002000  | -4.432998000 | 7.685998000  |
| H | 6.657573885  | -3.136591581 | 6.491755659  |
| H | 5.518621042  | -2.965119997 | 7.862222636  |
| H | 6.185774237  | -4.872026564 | 4.897902623  |
| H | 4.559071316  | -5.375192209 | 4.593973717  |
| H | 4.382000000  | 1.434002000  | 7.274999000  |
| H | 4.777144947  | 3.026449220  | 7.943738326  |
| H | 4.309958370  | 1.714928323  | 9.024271269  |
| H | 1.929460132  | 1.366586086  | 6.182502383  |
| H | -0.257612632 | 2.493483900  | 6.549342513  |
| H | 3.245171766  | 4.329595571  | 10.231963682 |
| H | -1.392884354 | 4.412005313  | 8.287228458  |
| H | 1.496062192  | 5.798890878  | 11.184961360 |
| H | -0.791783807 | 5.848878532  | 10.229614904 |
| H | -4.352924947 | 1.602447151  | 7.608327541  |
| H | -5.325853503 | 2.031253787  | 8.689513565  |
| H | -1.366819192 | 1.840935889  | 1.731063184  |

**Cartesian coordinates of the met Fe(III)Fe(III) state model M(O<sub>br</sub>,H<sub>2</sub>O<sub>12</sub>) (Figure 7a):**

143 atoms:

|    |              |              |              |
|----|--------------|--------------|--------------|
| Fe | 0.232077134  | 0.237084785  | 0.250158929  |
| Fe | -1.065824926 | 0.099668457  | 3.162940605  |
| O  | -0.112235018 | -0.612702448 | 1.782913506  |
| O  | -2.100929972 | 1.315248284  | 1.409135727  |
| O  | -1.187622433 | -1.132073659 | -0.734197670 |
| H  | -1.878112813 | -1.379183417 | -0.048522256 |
| H  | -1.693057694 | -0.671115677 | -1.417898552 |
| C  | -0.660649302 | 3.492560953  | -2.510405320 |
| C  | -0.855085754 | 2.646716376  | -1.277739739 |
| O  | -1.526225627 | 3.112549901  | -0.321675881 |
| O  | -0.335683911 | 1.471135418  | -1.303830818 |
| C  | 3.391126948  | 3.410217079  | 1.695106118  |
| C  | 2.438052880  | 2.922625111  | 2.771290207  |
| C  | 1.283336801  | 2.048462442  | 2.316322353  |
| O  | 1.258714903  | 1.727421403  | 1.077419684  |
| O  | 0.435170746  | 1.714779400  | 3.188759498  |
| C  | 2.931374637  | 0.352598530  | -2.372302924 |
| C  | 2.786245381  | -0.833394887 | -1.487684631 |
| N  | 1.842486479  | -0.934370484 | -0.475602246 |
| C  | 3.517176455  | -1.997518299 | -1.500135090 |
| C  | 2.017351622  | -2.126205385 | 0.091248855  |
| N  | 3.013558360  | -2.788499691 | -0.500326870 |
| C  | 1.532041286  | 1.068992105  | -9.524729448 |
| C  | 0.866600541  | 0.727858937  | -8.221115325 |
| C  | 0.216391550  | -0.502145468 | -8.038279259 |

|   |              |              |              |
|---|--------------|--------------|--------------|
| C | 0.864677699  | 1.621253711  | -7.146232391 |
| C | -0.414485454 | -0.827912238 | -6.842087479 |
| C | 0.235874716  | 1.314747246  | -5.940366937 |
| C | -0.409554892 | 0.087566073  | -5.786220723 |
| O | -1.050621883 | -0.271459332 | -4.626597537 |
| C | -5.651515873 | 0.934178373  | 4.682556101  |
| C | -4.416872071 | 1.515608466  | 4.009398683  |
| C | -3.195133294 | 1.671666990  | 4.904794980  |
| O | -3.309883499 | 2.190968277  | 6.034531542  |
| O | -2.042538734 | 1.316658605  | 4.437086946  |
| C | -2.900725239 | -4.523925386 | 2.630304211  |
| C | -3.776748344 | -3.276099926 | 2.739784913  |
| C | -3.087654498 | -2.045117701 | 2.169673548  |
| O | -3.065006729 | -1.901940788 | 0.920731351  |
| O | -2.591790115 | -1.230203508 | 3.024628249  |
| C | -1.920255573 | -1.349668359 | 6.575359218  |
| C | -0.578405236 | -1.570013405 | 5.972141668  |
| N | -0.126991195 | -1.040144003 | 4.768910930  |
| C | 0.434256182  | -2.324735696 | 6.510058947  |
| C | 1.117908288  | -1.479595100 | 4.609807884  |
| N | 1.487289650  | -2.249158925 | 5.639357478  |
| C | 8.612702126  | -8.931114628 | -1.715676294 |
| C | 7.314273676  | -8.184279008 | -1.707605098 |
| C | 6.549197133  | -7.892267868 | -0.597588440 |
| C | 6.634986436  | -7.569326797 | -2.816528602 |
| N | 5.449958493  | -7.149624932 | -0.942029498 |
| C | 5.475746102  | -6.923794847 | -2.291487183 |
| C | 6.874645537  | -7.494104946 | -4.203686553 |
| C | 4.576291276  | -6.223170684 | -3.103927736 |
| C | 5.981451734  | -6.800276615 | -5.010669955 |
| C | 4.843011779  | -6.170124537 | -4.466649724 |
| C | 2.014984414  | -5.230372611 | 2.483087801  |
| C | 3.293468277  | -5.883429223 | 1.952085826  |
| O | 3.981962419  | -6.590301048 | 2.742576775  |
| O | 3.598303897  | -5.635173679 | 0.738001424  |
| C | 6.334707557  | -3.690143614 | 6.899397526  |
| C | 5.140587866  | -4.139591032 | 6.097147289  |
| O | 3.986148944  | -3.747376229 | 6.362851612  |
| N | 5.396162792  | -5.011332850 | 5.112129022  |
| C | 4.008001768  | 2.012732761  | 8.128804111  |
| C | 2.592003475  | 2.438786996  | 7.902464090  |
| C | 1.803712468  | 2.080840619  | 6.833306118  |
| C | 1.764413131  | 3.277435661  | 8.730503946  |
| N | 0.557428527  | 2.642618547  | 6.938551563  |
| C | 0.494140073  | 3.379111557  | 8.090500217  |
| C | 1.952600964  | 3.952093379  | 9.952667253  |
| C | -0.562722931 | 4.119949945  | 8.628210056  |
| C | 0.904282118  | 4.688842559  | 10.490155660 |
| C | -0.340628826 | 4.773676051  | 9.834499383  |
| O | -4.598264618 | 1.257380783  | 8.652563191  |
| H | -0.840539605 | 4.546704626  | -2.287161749 |
| H | 0.343558518  | 3.357883425  | -2.921347395 |
| H | -1.388807991 | 3.174883814  | -3.267657147 |
| H | 3.901912422  | 2.577629466  | 1.198983731  |
| H | 2.867986916  | 3.987107094  | 0.924334194  |
| H | 4.155306225  | 4.056779019  | 2.143284758  |
| H | 1.996292353  | 3.763030511  | 3.322231409  |
| H | 2.979213285  | 2.337332543  | 3.528389341  |
| H | 3.779463826  | 0.212295799  | -3.047785449 |

|   |              |              |               |
|---|--------------|--------------|---------------|
| H | 2.035025371  | 0.507010698  | -2.981368327  |
| H | 3.097167360  | 1.268534487  | -1.794568618  |
| H | 4.343270273  | -2.315540973 | -2.123822413  |
| H | 1.432633731  | -2.517647007 | 0.909460774   |
| H | 3.323212743  | -3.718564417 | -0.222224614  |
| H | 2.198001000  | 0.260000000  | -9.843999000  |
| H | 0.793476722  | 1.211001983  | -10.325866006 |
| H | 2.120502082  | 1.988579916  | -9.446431457  |
| H | 0.198622399  | -1.230191989 | -8.850638397  |
| H | 1.365042813  | 2.585312176  | -7.241854597  |
| H | -0.916512533 | -1.786732622 | -6.718435991  |
| H | 0.254199581  | 2.036359779  | -5.125662833  |
| H | -1.861889022 | 2.039048697  | 0.734356407   |
| H | -6.479119267 | 0.888578559  | 3.963034026   |
| H | -5.467392846 | -0.087245619 | 5.039461316   |
| H | -5.978113917 | 1.539559979  | 5.534655439   |
| H | -4.639888753 | 2.530026593  | 3.645254444   |
| H | -4.148873744 | 0.923982494  | 3.135032427   |
| H | -1.968596898 | -4.409190768 | 3.197800313   |
| H | -3.434086942 | -5.394902004 | 3.030723155   |
| H | -2.640486169 | -4.737585974 | 1.586463525   |
| H | -4.041451461 | -3.092653230 | 3.786481044   |
| H | -4.704059934 | -3.430474725 | 2.173109451   |
| H | -1.999174336 | -1.927765065 | 7.501106817   |
| H | -2.085238767 | -0.295436785 | 6.814550579   |
| H | -2.723911293 | -1.665786357 | 5.904042290   |
| H | 0.487086419  | -2.897226333 | 7.427707841   |
| H | 1.768937583  | -1.254241258 | 3.777910244   |
| H | 2.384530607  | -2.714338095 | 5.752151642   |
| H | 9.467999000  | -8.258002000 | -1.545000000  |
| H | 8.639272698  | -9.691055009 | -0.926094407  |
| H | 8.784760125  | -9.438972316 | -2.671199384  |
| H | 6.712427265  | -8.165932616 | 0.439988826   |
| H | 4.799839213  | -6.713305355 | -0.276039088  |
| H | 7.748003844  | -7.973632100 | -4.646574540  |
| H | 3.690093897  | -5.746643600 | -2.685512344  |
| H | 6.160536040  | -6.741037481 | -6.084142723  |
| H | 4.158739687  | -5.634563598 | -5.123709835  |
| H | 1.606002000  | -5.719000000 | 3.376000000   |
| H | 2.256251126  | -4.197726747 | 2.764031072   |
| H | 1.246771181  | -5.189165480 | 1.704236713   |
| H | 6.513002000  | -4.433001000 | 7.686001000   |
| H | 7.243997597  | -3.624196787 | 6.293539961   |
| H | 6.124948744  | -2.727493399 | 7.370150279   |
| H | 6.340102496  | -5.314521636 | 4.927098500   |
| H | 4.658184729  | -5.408584010 | 4.542344141   |
| H | 4.382000000  | 1.434001000  | 7.274999000   |
| H | 4.676475288  | 2.872718526  | 8.267106255   |
| H | 4.107765520  | 1.387002646  | 9.026568542   |
| H | 2.045445656  | 1.452409512  | 5.986022855   |
| H | -0.207339362 | 2.484794714  | 6.297563885   |
| H | 2.905876208  | 3.895962238  | 10.478641151  |
| H | -1.524825738 | 4.179494881  | 8.121085643   |
| H | 1.041531016  | 5.207442954  | 11.438711693  |
| H | -1.146509324 | 5.354447665  | 10.282305864  |
| H | -4.228312941 | 1.560519199  | 7.805598087   |
| H | -5.385801994 | 1.811771989  | 8.752144727   |
| H | -2.738123987 | 0.743287857  | 0.963099043   |
| H | -0.984462809 | 0.467215461  | -4.005699321  |
